# Supplementary material for: Hydrothermal carbon-based nanostructured hollow spheres as electrode materials for high-power lithium–sulfur batteries
Source: Royal Society of Chemistry journal article supplement (doi:10.1039/c3cp50653c), 2013-01-01
Supplement: c3cp50653c.pdf [file c3cp50653c.pdf]

## Supporting Information

### Hydrothermal Carbon-based Nanostructured Hollow Spheres for Electrode Materials of High-Power Lithium-Sulphur Batteries

Nicolas Brun,<sup>1</sup> Ken Sakaushi,<sup>\*2,3</sup> Linghui Yu,<sup>1</sup> Lars Giebeler,<sup>2</sup> Jürgen Eckert,<sup>2,4</sup> and  
Magdalena M. Titirici<sup>\*1</sup>

<sup>1</sup>Max-Planck Institute for Colloids and Interfaces, Am Muehlenberg, Golm, D-14476  
Golm/Potsdam, Germany

<sup>2</sup>IFW Dresden, Institute for Complex Materials, Helmholtzstr. 20, D-01069 Dresden, Germany

<sup>3</sup>TU Dresden, Department of Inorganic Chemistry, Bergstr. 66, D-01069 Dresden, Germany

<sup>4</sup>TU Dresden, Institute of Materials Science, Helmholtzstr. 7, D-01069 Dresden, Germany

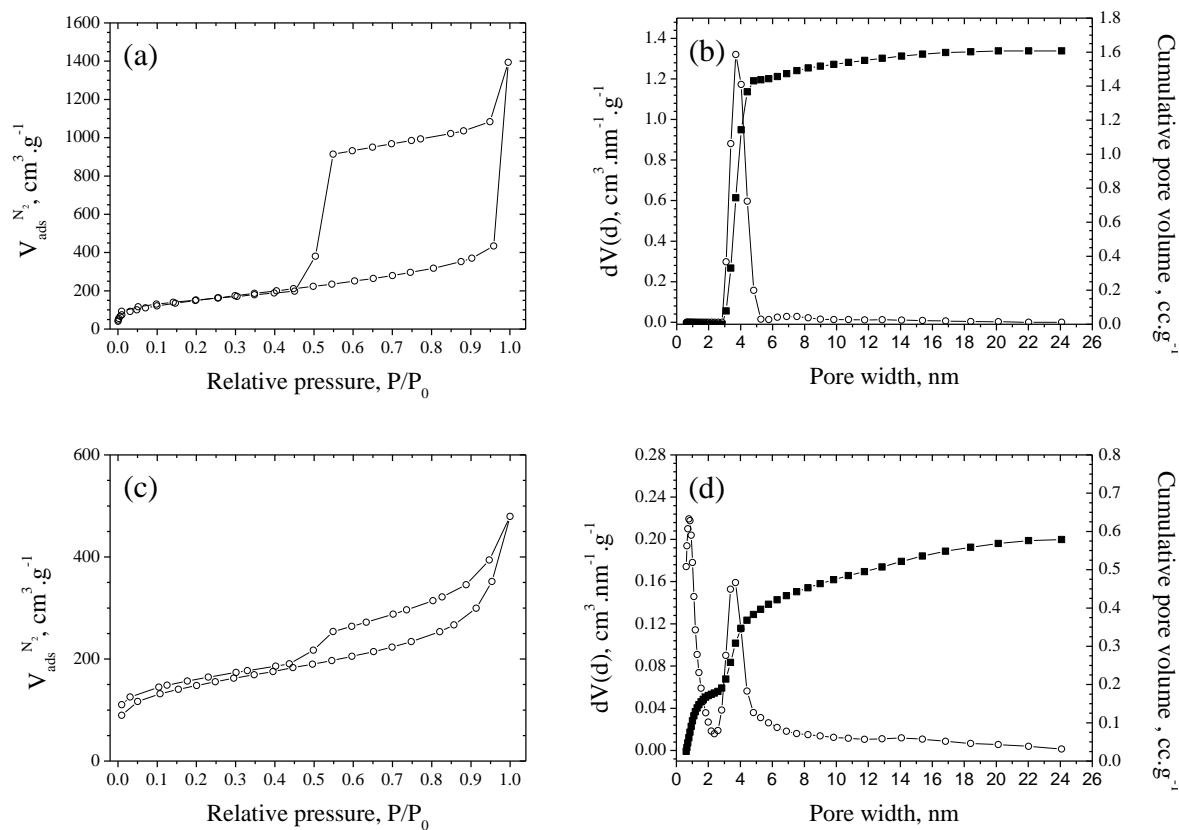

**Figure S1.** Nitrogen sorption isotherms and DFT pore size distributions of the carbon-based hollow spheres after further thermal treatment at 550 °C and silica removal obtained from xylose, 550-CarbHS-X (a-b) and from glucose, 550-CarbHS-G (c-d).

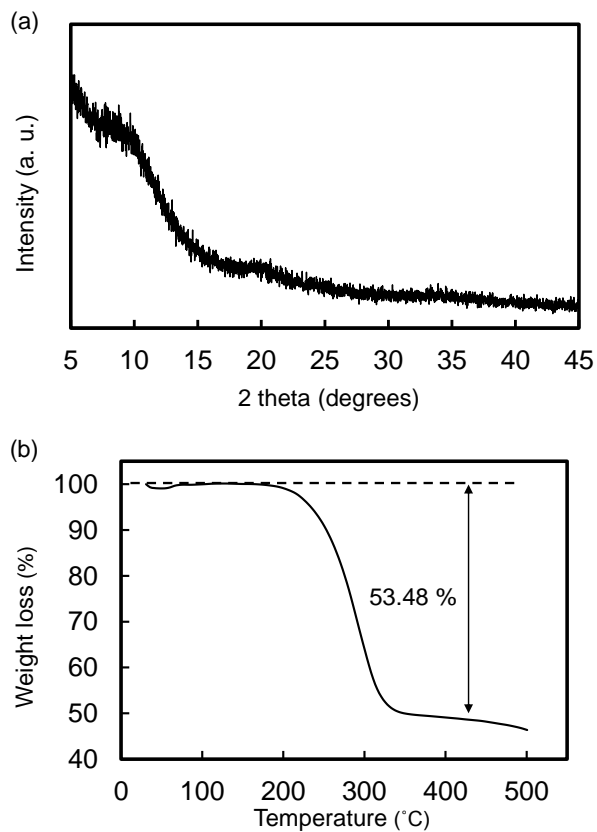

**Figure S2.** (a) Typical XRD pattern for HCNSs/S composite. XRD patterns were recorded by using PANalytical X'Part PRO with Co K $\alpha$  radiation. (b) Thermal gravimetric analysis (TGA) for HSs/S composite. TGA was carried out by using NETZSCH STA 409C/CD with heating ratio of 5 K min<sup>-1</sup>.

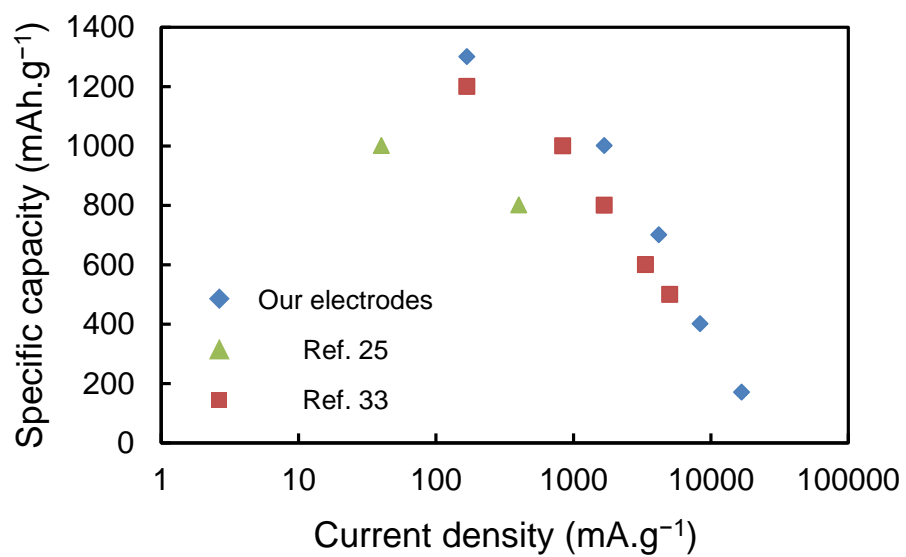

**Figure S3. Comparison of the rate capability in current density vs. specific capacity.**

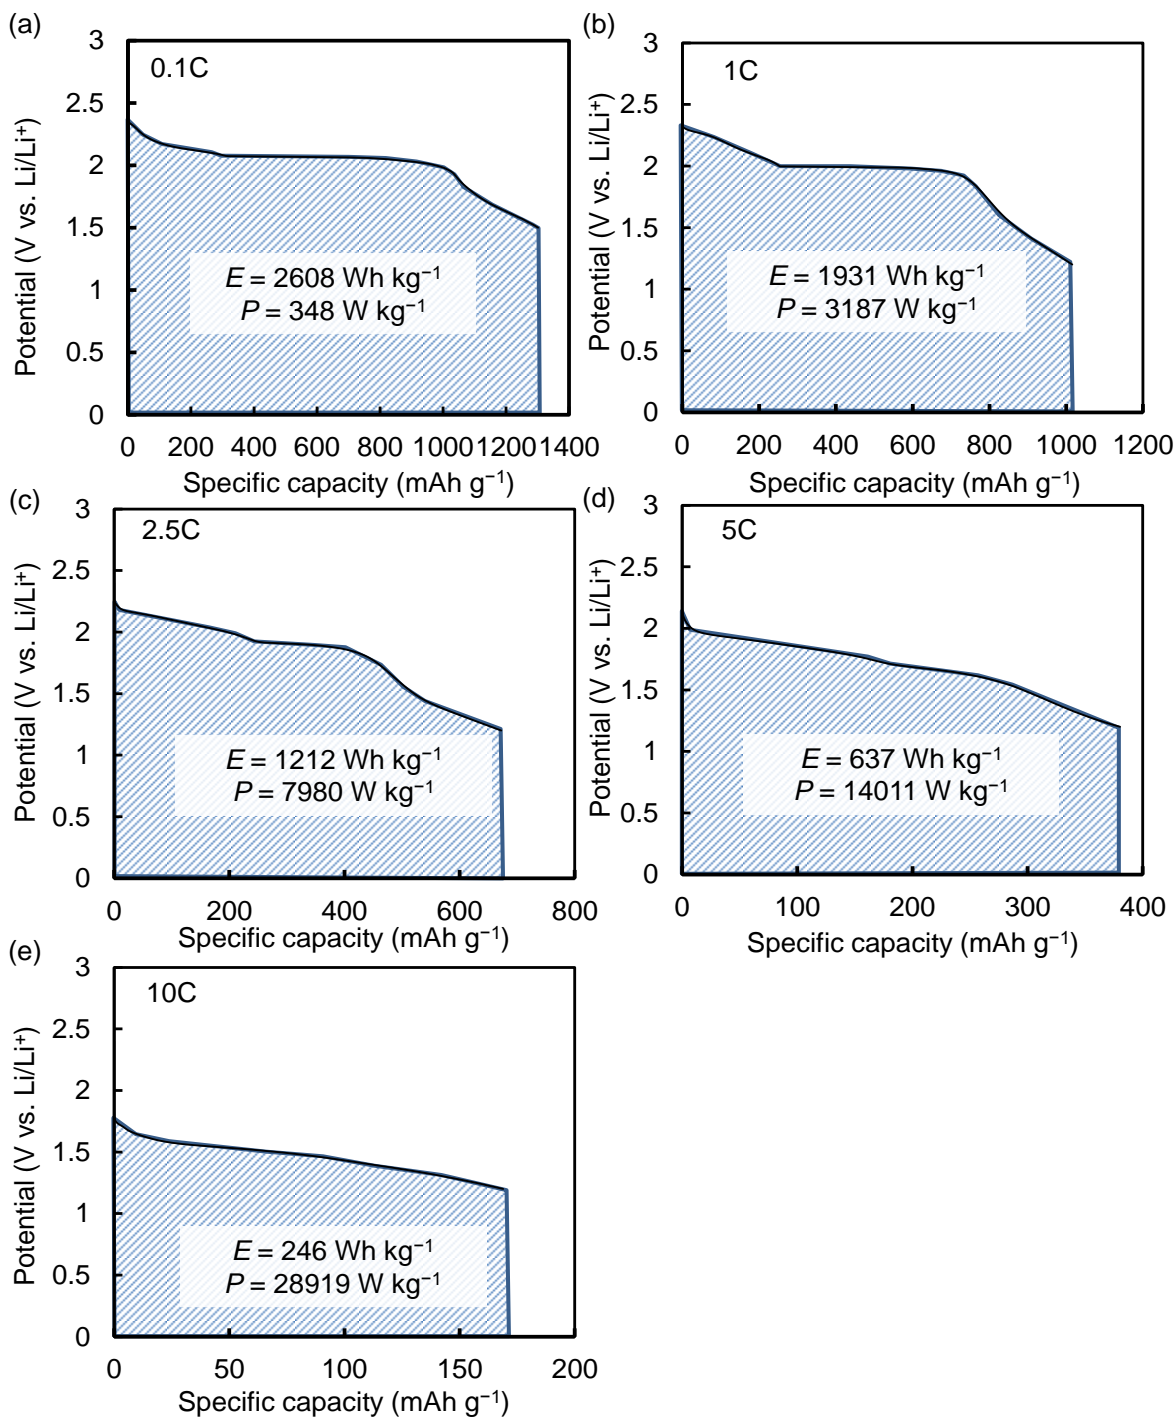

**Figure S4. Specific energy and specific power for Li-S cells using HSs in various current densities.** (a) Result at a current density of 0.1C (= 167.5 mA g<sup>-1</sup>). (b) Result at a current density of 1C (= 1675 mA g<sup>-1</sup>). (c) Result at a current density of 2.5C (= 4187.5 mA g<sup>-1</sup>). (d) Result at a current density of 5C (= 8375 mA g<sup>-1</sup>). (e) Result at a current density of 10C (= 16.75 A g<sup>-1</sup>).

Here, all properties were calculated based on the weight of sulfur. In the Figure 5b, we assumed that mass of  $\text{Li}_2\text{S}$  will comprise 25 % of the total device weight.
